# Supplementary material for: LncRNA HOXC-AS3 promotes non-small-cell lung cancer growth and metastasis through upregulation of YBX1
Source: PubMed Central journal article supplement (PMC8986809; doi:10.1038/s41419-022-04723-x), 2022-04-06
Supplement: 41419_2022_4723_MOESM4_ESM.pdf [file 41419_2022_4723_MOESM4_ESM.pdf]

This document certifies that the manuscript

## **LncRNA HOXC-AS3 promotes non-small-cell lung cancer growth and metastasis through upregulation of YBX1**

prepared by the authors

**Xue-Shan Qiu**

was edited for proper English language, grammar, punctuation, spelling, and overall style by one or more of the highly qualified native English speaking editors at AJE.

This certificate was issued on **December 6, 2021** and may be verified on the [AJE website](#) using the verification code **DFBA-AE79-17BA-5674-2506**.

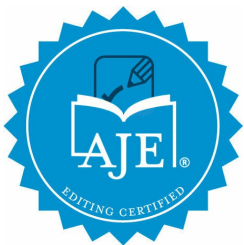

Neither the research content nor the authors' intentions were altered in any way during the editing process. Documents receiving this certification should be English-ready for publication; however, the author has the ability to accept or reject our suggestions and changes. To verify the final AJE edited version, please visit our verification page at [aje.com/certificate](#). If you have any questions or concerns about this edited document, please contact AJE at [support@aje.com](mailto:support@aje.com).
